# Supplementary material
Source: MDPI journal article supplement (https://www.mdpi.com/2073-4441/14/13/2015)
Supplement: s1 [file s1]

Supplementary Information for:

**A comparison study of the nutrient fluxes in a newly-impounded  
riverine lake (Longjing Lake): model calculation and sediment  
incubation**

Cheng Du<sup>1,2</sup>, Yan'an Pan<sup>1,3</sup>, Wenzhong Tang<sup>1,4</sup>, Qiansheng Yue<sup>2</sup>, Hong Zhang<sup>1,4\*</sup>

1. State Key Laboratory of Environmental Aquatic Chemistry, Research Center for Eco-Environmental Sciences,

Chinese Academy of Sciences, Beijing 100085, China.

2. College of Chemistry & Environmental Engineering, Yangtze University, Jingzhou, 434023, China.

3. Lanzhou LS Heavy Equipment Co., Ltd, Lanzhou, 730050, China.

4. University of Chinese Academy of Sciences, Beijing 100049, China.

\*To whom correspondence should be addressed. E-mail: hongzhang@rcees.ac.cn

This file includes:

SUPPLEMENTARY EXPERIMENT EQUIPMENT (S1)

SUPPLEMENTARY FIGURES (S2-S3)

## SUPPLEMENTARY EXPERIMENT EQUIPMENT:

The experimental equipment, which is placed in the laboratory (the temperature is about 25°C).

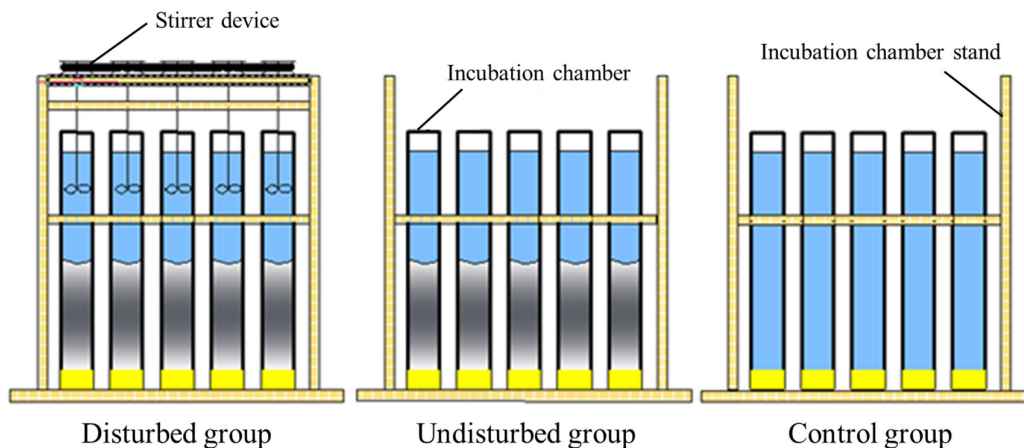

**Figure S1.** Diagram of laboratory simulation experiment apparatus.

## SUPPLEMENTARY FIGURES:

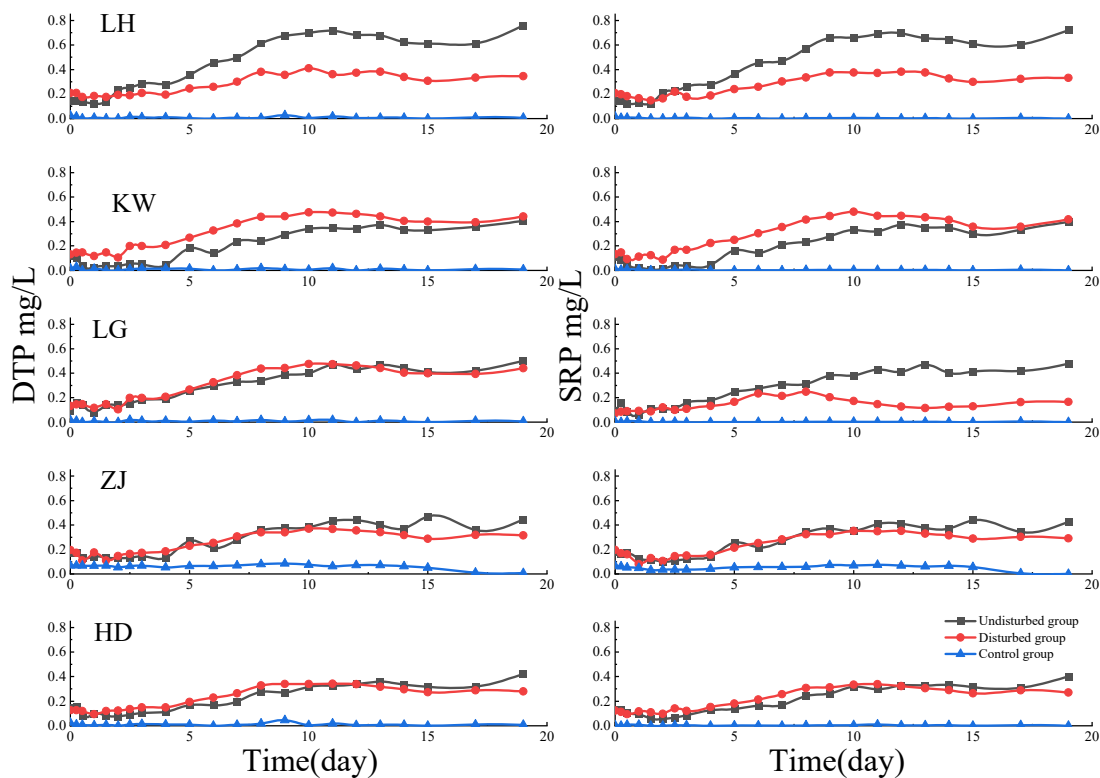

**Figure S2.** Cumulative changes in the concentrations of dissolved total phosphate (DTP) and

soluble reactive phosphate (SRP) at different sampling sites during the experiment. LH, kW, LG, ZJ, and HD are different sampling sites, respectively.

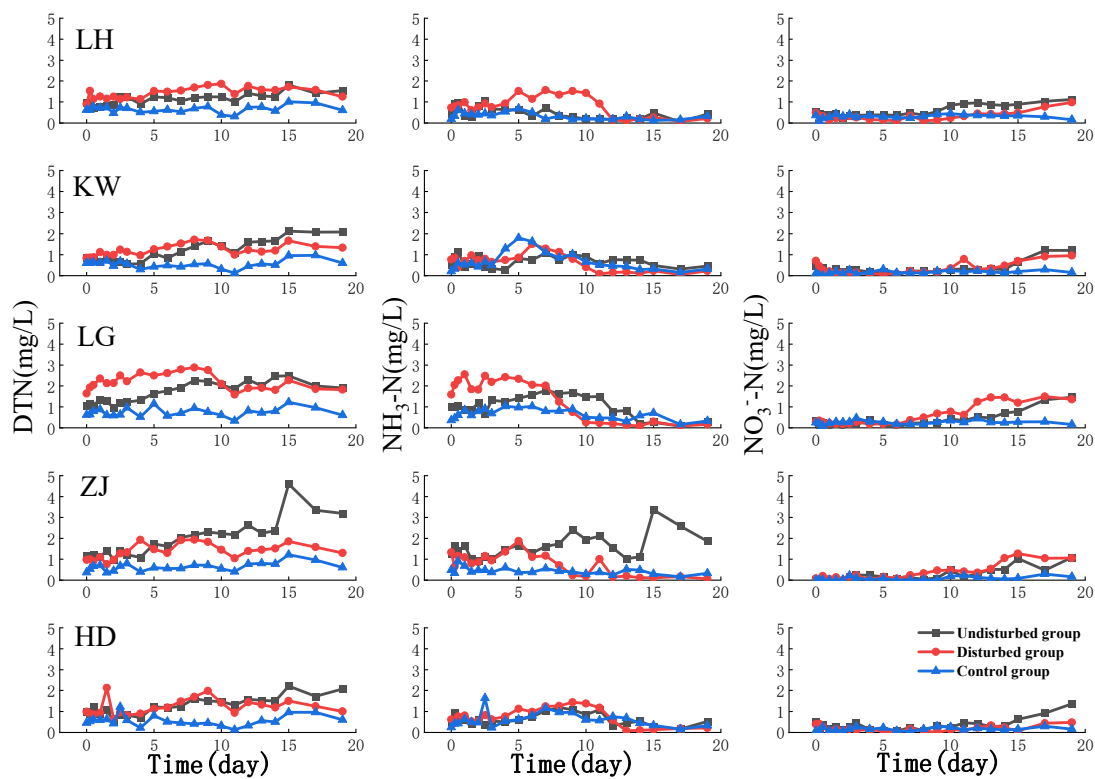

**Figure S3.** Cumulative changes in the concentrations of dissolved total nitrogen (DTN), nitrate ( $\text{NO}_3\text{-N}$ ), and ammonia ( $\text{NH}_4^+\text{-N}$ ) at different sampling sites during the experiment. LH, kW, LG, ZJ, and HD are different sampling sites, respectively.
